# Supplementary material for: Targeted carbon monoxide delivery combined with chemodynamic, chemotherapeutic and photothermal therapies for enhanced antitumor efficacy
Source: Royal Society of Chemistry journal article supplement (doi:10.1039/d2nj01088g), 2022-01-01
Supplement: d2nj01088g1.pdf [file d2nj01088g1.pdf]

# Targeted Carbon Monoxide Delivery Combined with Chemodynamic, Chemotherapeutic and Photothermal Therapies for Enhanced Antitumor Efficacy

Jing Liu,<sup>a</sup> Qi Tang,<sup>a</sup> Yi Wang,<sup>a</sup> Hai-Lin Zhang,<sup>a</sup> Bing Ren,<sup>a</sup> Shi-Ping Yang,<sup>b</sup> and Jin-Gang Liu<sup>\*a</sup>

<sup>a</sup>Key Laboratory for Advanced Materials, School of Chemistry & Molecular Engineering,  
East China University of Science and Technology, Shanghai 200237, P. R. China,  
E-mail: liujingang@ecust.edu.cn

<sup>b</sup>Key Lab of Resource Chemistry of Ministry of Education & Shanghai Key Lab of Rare Earth  
Functional Materials, Shanghai Normal University, Shanghai 200234, P. R. China

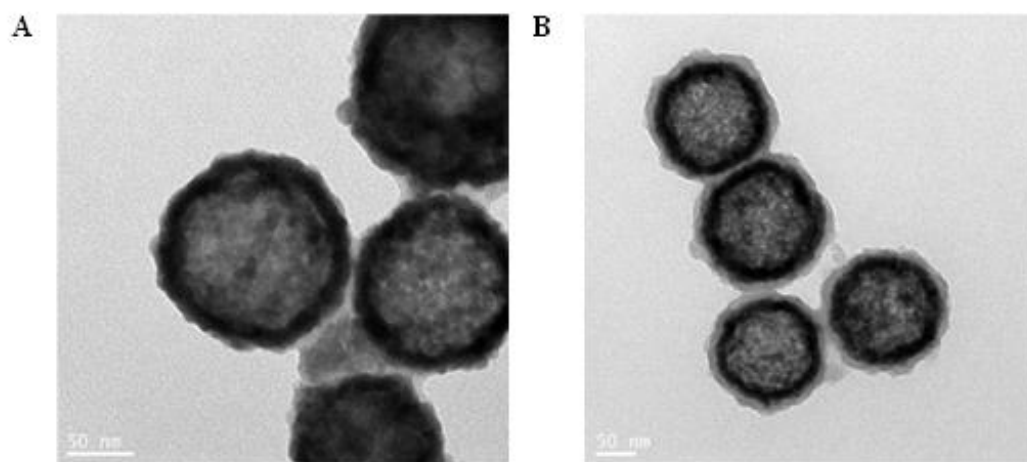

**Fig. S1** TEM image of (A) HMCuS and (B) HMCuS@DHA@PDA.

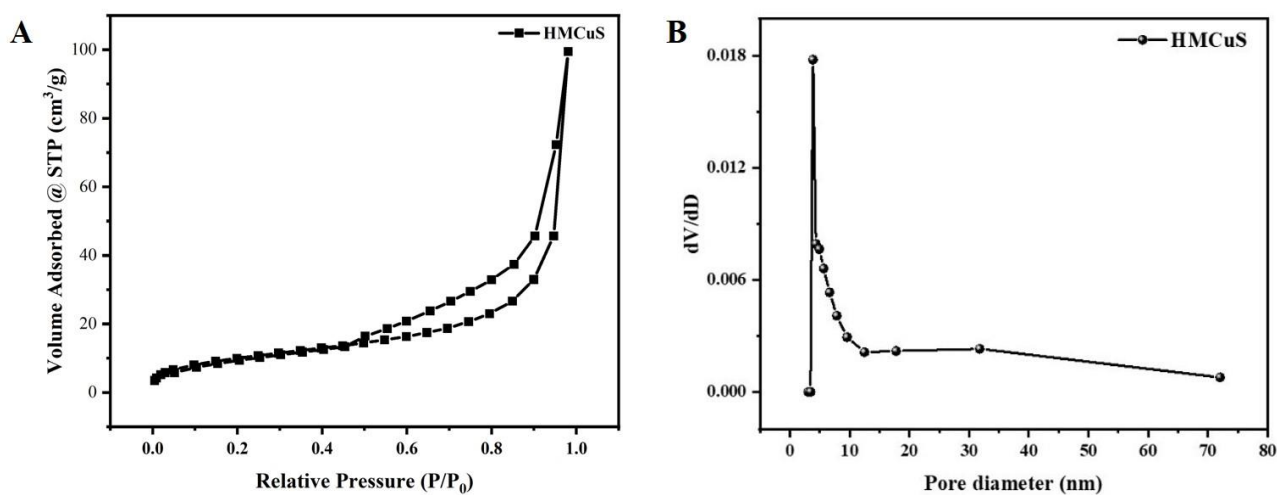

**Fig. S2** (A) N<sub>2</sub> adsorption–desorption isotherms and (B) Pore size distribution of HMCuS.

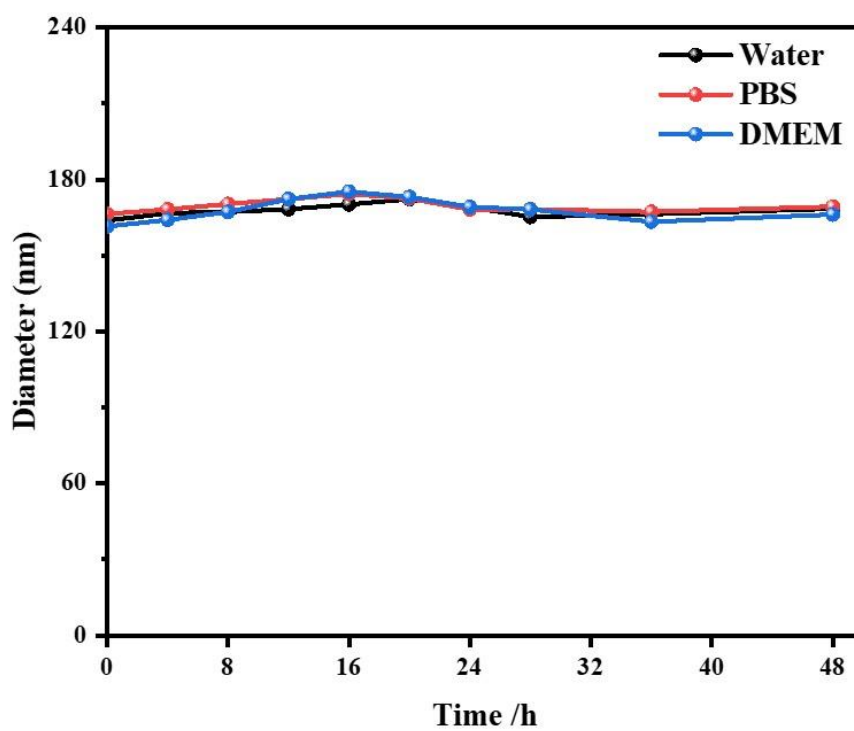

**Fig. S3** Particle size variation of HDPMF dispersed in PBS, water and DMEM within 48 h.

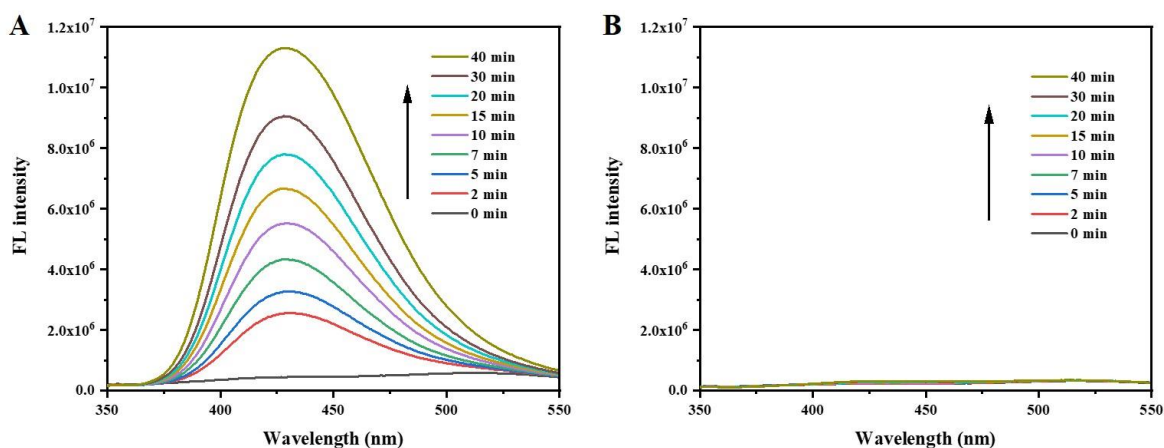

**Fig. S4** (A) Fluorescence spectral changes of TPA (1.0 mM) in the presence of (A) HMCuS@DHA@PDA (200 µg/mL) and H<sub>2</sub>O<sub>2</sub> (10 mM), (B) HMCuS@DHA@PDA (200 µg/mL), H<sub>2</sub>O<sub>2</sub> (10 mM), and DMSO (0.6 M) recorded at intervals as indicated. DMSO is a scavenger for ·OH species.

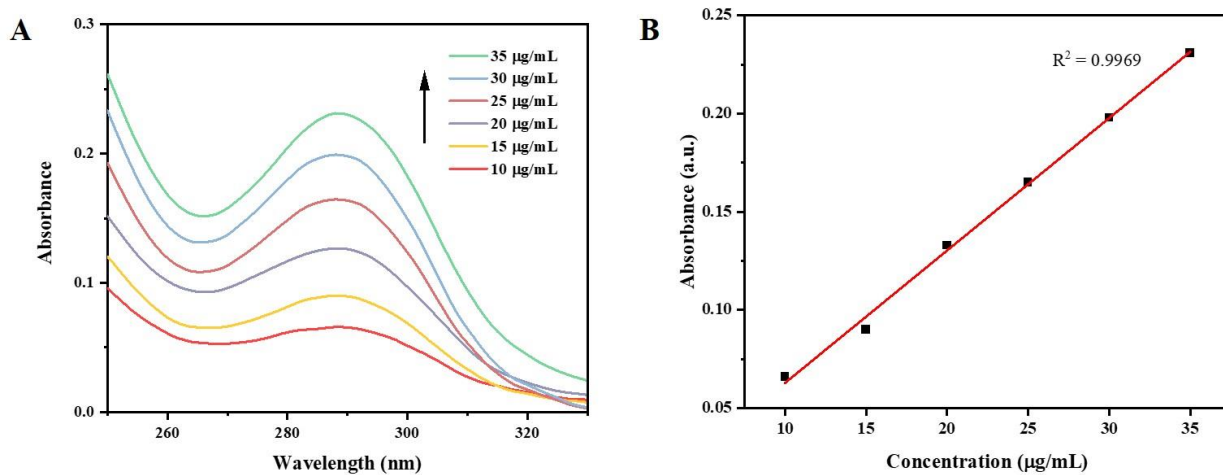

**Fig. S5** Standard curve for quantification of DHA via recording the absorption at 290 nm.

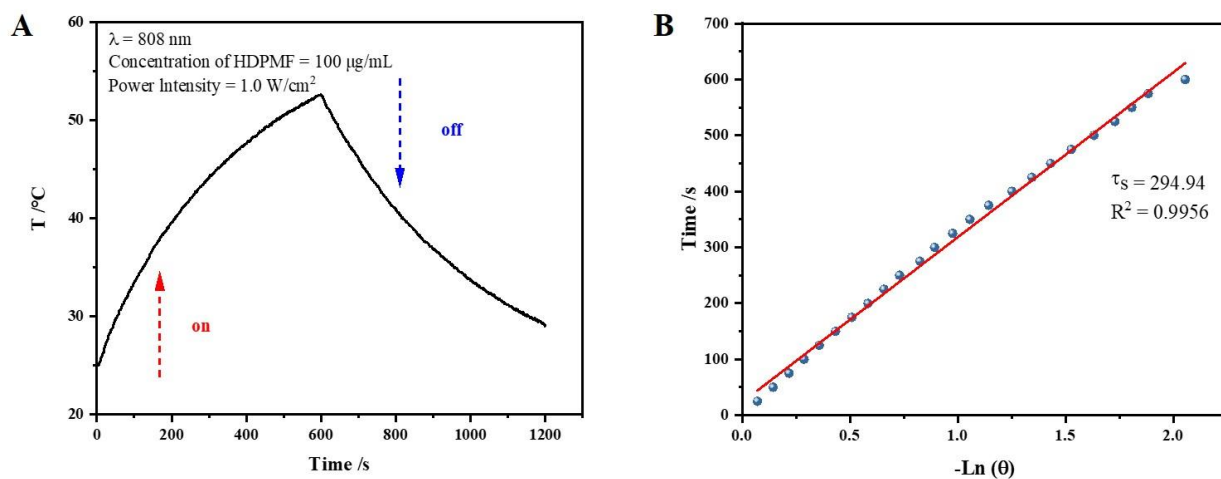

**Fig. S6 (A)** Photo-to-heat conversion capability of a HDPMF aqueous solution irradiated by an 808 nm ( $1.0 \text{ W/cm}^2$ ) laser. **(B)** The time constant was calculated from the cooling period.

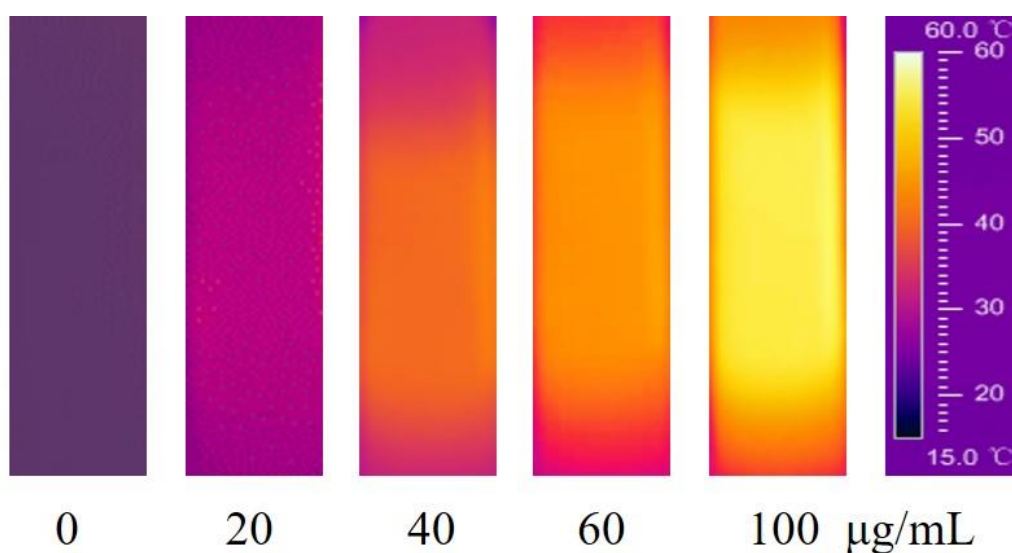

**Fig. S7** Infrared (IR) thermographic images of HDPMF solutions with varied concentrations (0, 20, 40, 60, 100  $\mu\text{g/mL}$ ) under 808 nm laser irradiation ( $1.0 \text{ W/cm}^2$ , 15 min).

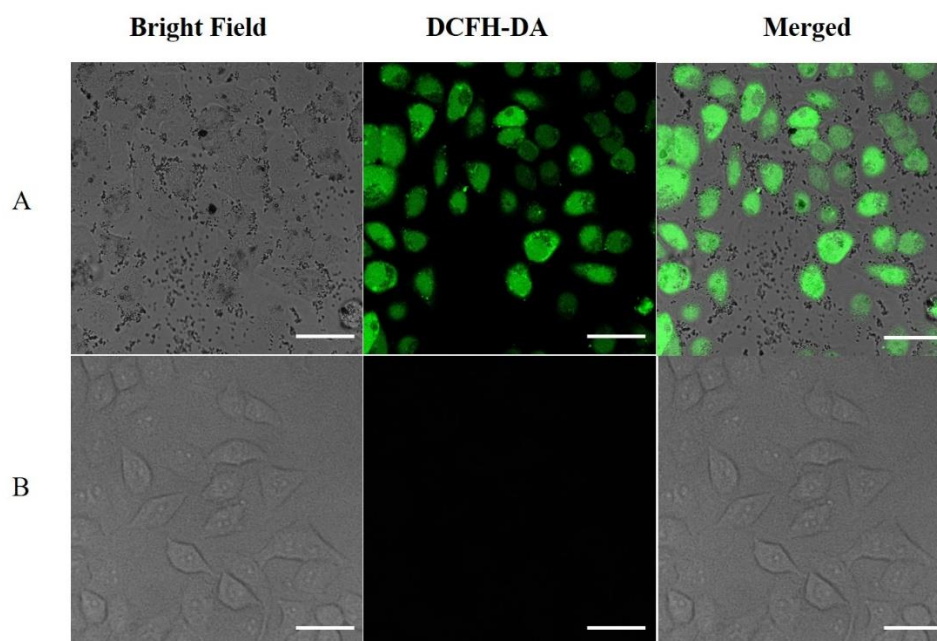

**Fig. S8** Intracellular ROS detection. Confocal microscopic images of HeLa cells with (15  $\mu\text{g}/\text{mL}$ ) (A) or without (B) HDPMF treatment in the presence of the DCFH-DA probe under the dark and 808 nm light irradiation (1.0  $\text{W}/\text{cm}^2$ , 10 min), respectively. Scale bar: 50  $\mu\text{m}$ .

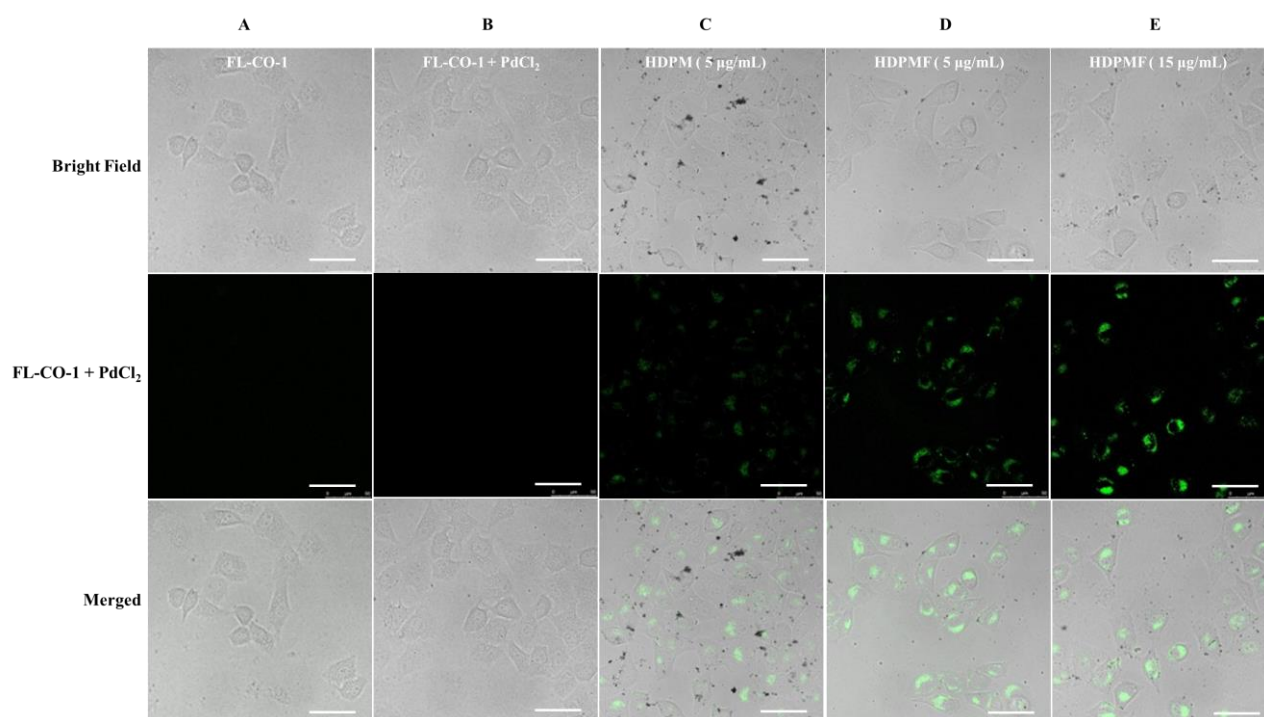

**Fig. S9** Intracellular CO detection. Confocal microscopic images of HeLa cells co-incubated with nanoplateforms and the probe system (FL-CO-1 + PdCl<sub>2</sub>, 1  $\mu\text{M}$  each). (A) FL-CO-1, (B) FL-CO-1 + PdCl<sub>2</sub>, (C) HDPM (5  $\mu\text{g}/\text{mL}$ ), (D) HDPMF (5  $\mu\text{g}/\text{mL}$ ), (E) HDPMF (15  $\mu\text{g}/\text{mL}$ ). Scale bar: 50  $\mu\text{m}$ .

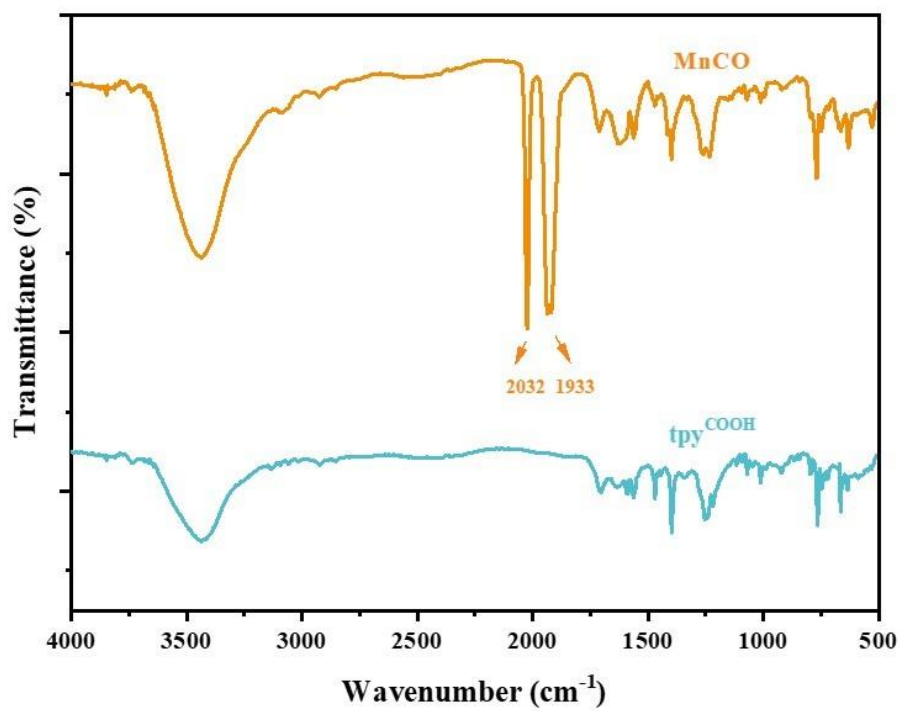

Fig. S10 FT-IR spectra of the MnCO and tpy<sup>COOH</sup>.

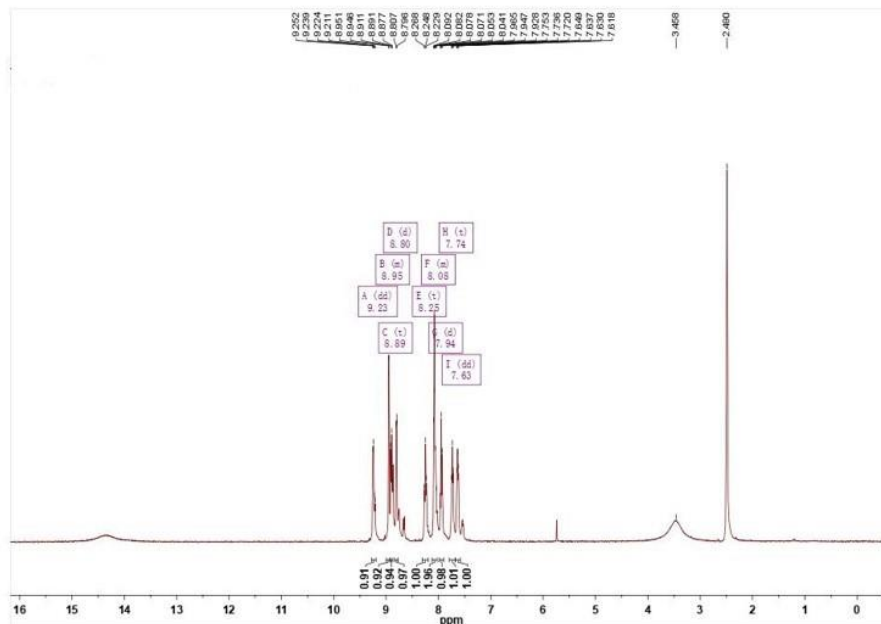

Fig. S11 <sup>1</sup>H NMR spectrum of MnCO in DMSO-d<sub>6</sub>.

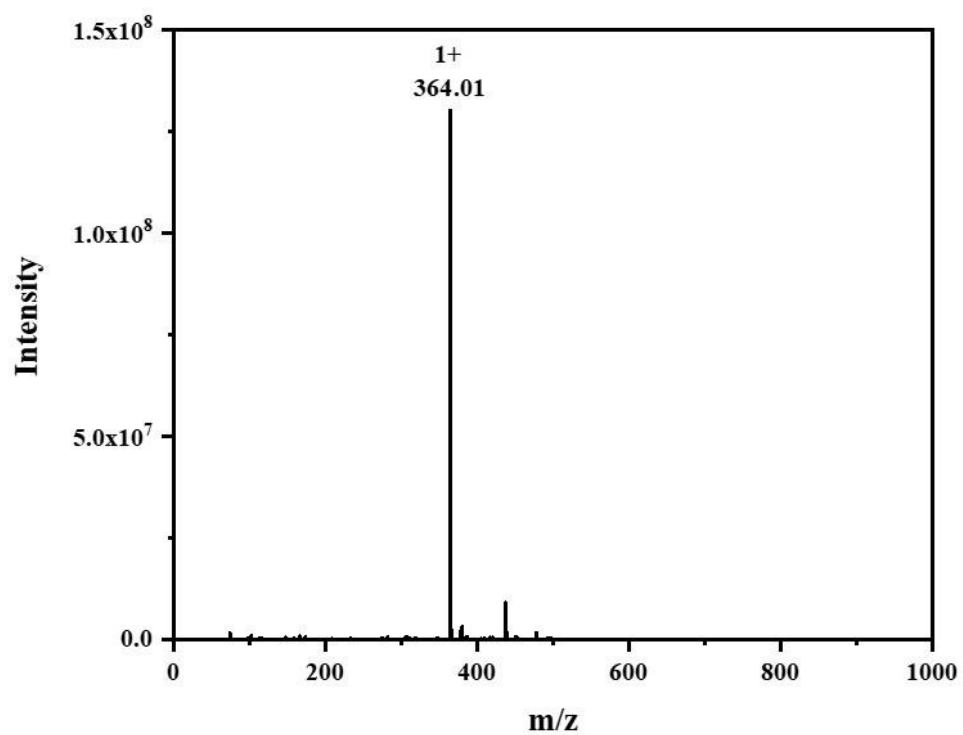

**Fig. S12** Mass spectrum of MnCO.
